# Supplementary material for: Post-weaning high-fat diet results in growth cartilage lesions in young male rats
Source: PLoS One. 2017 Nov 22;12(11):e0188411. doi: 10.1371/journal.pone.0188411 (PMC5699802; doi:10.1371/journal.pone.0188411)
Supplement: S1 Table — All data values obtained from plasma, DXA and osteochondrosis measurements from each experimental group (n = 40 animals, N = 4 groups). (XLSX) [file pone.0188411.s001.xlsx]

## Sheet: Sheet1
			Plasma Cytokines/ Insulin/ Leptin (pg/ml)								DXA										Joint score
Group	Group #	ID#	IFN	IL1a	IL10	TNF	IL1b	IL6	Insulin	Leptin	weight (g)	BMD (g/cm2)	BMC (g)	Total Fat%	T.Mass (g)	Reg. %fat	Fat (g)	Lean (g)	Fat free (g)	F:L ratio	OC score
HF-EX	2	3	15.19	7.47	19.04	1.03	1.78234	147.461	2.067	12.335	639.1	0.184	16.7	36	626	35	219	390	407	0.561538	1
HF-EX	2	4	9.01	8.15	29.32	1.18	3.80268	78.1267	5.604	9.805	623.7	0.176	15.5	40.7	601	39.6	238	347	363	0.685879	0
HF-EX	2	43	7.34	7.21	26.79	1.37	-1.2461	66.9641	3.079	6.165	567.6	0.176	13.5	23.7	555	23.1	128	413	426	0.309927	3
HF-EX	2	44	10.98	7.8	17.73	1.04	4.81327	121.799	0.796	7.885	533.1	0.165	13	31	521	30.2	158	350	363	0.451429	2
HF-EX	2	51	14.53	7.17	22.17	1.04	107.27	51.6875	0.415	3.435	491	0.167	11.5	22.8	479	22.2	107	361	373	0.296399	2
HF-EX	2	52	25.33	10.43	53.05	1.68	-4.27205	57.233	1.26	9.605	551.2	0.169	13.2	30.8	537	30	161	363	376	0.443526	7
HF-EX	2	67	7.34	7.86	40.69	1.3	11.8951	60.0099	3.599	21.235	629.3	0.172	16.1	50.3	614	49	301	297	313	1.01347	5
HF-EX	2	68	13.46	7.46	20.48	1.3	0.77258	48.919	0.944	7.885	526.9	0.172	13.5	31.8	513	31	159	341	354	0.466276	5
HF-EX	2	75	8.26	7.67	21.53	0	32.2038	66.9641	1.785	3.94	500.5	0.172	11.8	17.4	490	17	83	395	407	0.210127	1
HF-EX	2	76	3.82	7.37	15.3	0.29	2.79237	37.8722	0.855	3.84	495.8	0.178	12.4	21.4	483	20.9	101	370	382	0.272973	3
HF-SED	3	29	8.44	8.8	17.93	1.25	8.85839	43.3901	2.049	9	653.7	0.177	15.8	43.8	641	42.7	274	352	367	0.778409	2
HF-SED	3	30	17.2	7.93	30.37	0.75	9.87036	62.7895	1.789	29.02	830.9	0.174	18.2	53.2	820	52	427	375	394	1.13867	2
HF-SED	3	37	17.88	7.47	26.12	4.18	10.8826	54.4589	1.622	11.12	761.4	0.19	18.8	40.3	748	39.3	294	435	454	0.675862	5
HF-SED	3	38	11.99	7.22	54.29	1.2	10.8826	35.1174	2.095	5.055	624.9	0.177	14.9	35.9	615	35.1	216	385	400	0.561039
HF-SED	3	45	8.44	7.32	26.57	0.54	27.1162	43.3901	6.82	35.8	729.5	0.183	18.3	58.2	720	56.8	409	293	312	1.3959	6
HF-SED	3	46	14.53	9.13	254.93	2.03	22.0356	29.6161	0.406	6.67	657.4	0.179	16.5	50.7	647	49.4	319	311	327	1.02572	1
HF-SED	3	53	15.85	7.26	18.74	1.14	35.2596	33.741	2.272	28.72	653.7	0.176	16.8	51.4	641	50	320	303	320	1.05611
HF-SED	3	54	5.26	7.06	33.83	1.58	2.79237	43.3901	6.802	41.36	775.5	0.186	18.8	54.2	761	52.8	402	340	359	1.18235	3
HF-SED	3	61	8.82	7.26	45.76	1.96	5.82413	33.741	9.178	50.665	779.8	0.18	18	62.4	769	60.9	468	283	301	1.65371	2
HF-SED	3	62	7.7	7.36	22.49	3.16	9.87036	60.0099	8.185	55.215	871.7	0.181	19.9	63.1	854	61.7	527	308	328	1.71104	2
Chow-SED	4	7	15.41	7.7	19.25	0.98	12.9079	37.8722	1.975	3.235	503.2	0.159	10.8	22.9	490	22.3	110	370	381	0.297297	0
Chow-SED	4	8	23.1	7.86	20.48	1.25	-4.27205	78.1267	2.04	3.64	602.3	0.169	13.1	24.1	589	23.5	139	437	450	0.318078	1
Chow-SED	4	15	15.85	7.17	14.07	0.54	35.2596	109.051	0.972	4.245	605.5	0.171	13.7	25.8	591	25.2	149	429	443	0.347319	0
Chow-SED	4	16	21.16	7.53	20.59	0.64	-0.2369	37.8722	1.121	6.775	696.6	0.185	15.4	33.6	679	32.8	223	441	456	0.505669	0
Chow-SED	4	63	12.62	7.97	30.84	0.75	26.0996	35.1174	0.777	6.775	559	0.175	12.9	28.5	558	27.8	155	390	403	0.397436	0
Chow-SED	4	64	21.89	8.92	34.19	1.99	2.79237	39.2506	1.251	10.615	619	0.177	14.8	34.9	600	34.1	204	381	396	0.535433	0
Chow-SED	4	71	16.07	7.91	28.74	0.54	1.78234	37.8722	0.42	2.425	507.1	0.165	11.8	21.3	499	20.8	104	383	395	0.27154	3
Chow-SED	4	72	12.62	7.4	25.78	0.36	13.921	42.0096	2.322	5.66	609.9	0.174	14.3	28.2	601	27.5	165	421	435	0.391924	4
Chow-SED	4	79	6.8	7.06	15.3	0.55	-3.26368	48.919	1.843	5.965	549.5	0.16	11.9	28.1	534	27.5	147	376	388	0.390957	1
Chow-SED	4	80	7.7	7.33	18.94	0.31	13.921	53.0729	5.56	9.805	606.5	0.17	15.3	41.9	589	40.9	240	333	348	0.720721	0
Chow-EX	5	81	3.82	6.81	12.17	0.51	4.81327	35.1174	1.422	4.85	566.3	0.161	12.1	19.8	528	19.3	102	414	426	0.246377	0
Chow-EX	5	82	6.8	12.73	86.86	0.74	7.84669	65.5719	1.61	1.715	468.5	0.167	10.5	11.5	451	11.2	51	390	400	0.130769	0
Chow-EX	5	83	10.77	9.41	23.57	0.46	13.921	62.7895	0.231	1.415	476.2	0.163	10.2	9.4	453	9.2	41	401	411	0.102244	1
Chow-EX	5	84	0.24	7.3	22.07	0.45	8.85839	46.1531	0.608	1.82	554.9	0.17	11.4	11.6	521	11.4	59	450	462	0.131111	0
Chow-EX	5	85	9.4	6.99	16.55	0.51	1.78234	47.5357	1.552	1.31	479.9	0.159	10.2	10.6	453	10.,4	47	396	406	0.118687	0
Chow-EX	5	86	7.16	7.72	18.03	0.29	11.8951	43.3901	0.71	2.425	492	0.154	10.1	13.3	441	13	57	374	384	0.152406	0
Chow-EX	5	87	7.89	7.79	12	0.74	3.80268	42.0096	0.884	1.82	477.7	0,159	9.9	11.4	431	11.1	48	373	383	0.128686	0
Chow-EX	5	88	3.37	7.43	23.47	0.23	8.85839	53.0729	0.303	0.805	426.4	0.156	9.3	8.8	398	8.6	34	354	364	0.0960452	0
Chow-EX	5	89	1.97	8.24	35.29	0.75	20.0053	46.1531	1.03	1.615	512.8	0.166	10.6	8	465	7.8	36	418	429	0.0861244	0
Chow-EX	5	90	10.38	7.14	20.17	1.35	3.80268	46.1531	0.71	0.805	471.2	0.17	10.3	9.3	432	9.1	39	382	393	0.102094	0

## Sheet: Sheet2
Rat #	Group	weight	leptin (ng/ml)	Insulin (ng/ml)	BMD (g/cm2)	BMC (g)	Total Fat%	T.Mass (g)	Reg. %fat	Fat (g)	Lean (g)	Fat free (g)	F:L ratio	OC total joint sum
81	Chow-EX	566.3	4.85	1.422	0.161	12.1	19.8	528	19.3	102	414	426	0.246377	0
82	Chow-EX	468.5	1.715	1.61	0.167	10.5	11.5	451	11.2	51	390	400	0.130769	0
83	Chow-EX	476.2	1.415	0.231	0.163	10.2	9.4	453	9.2	41	401	411	0.102244	1
84	Chow-EX	554.9	1.82	0.608	0.17	11.4	11.6	521	11.4	59	450	462	0.131111	0
85	Chow-EX	479.9	1.31	1.552	0.159	10.2	10.6	453	10.,4	47	396	406	0.118687	0
86	Chow-EX	492	2.425	0.71	0.154	10.1	13.3	441	13	57	374	384	0.152406	0
87	Chow-EX	477.7	1.82	0.884	0,159	9.9	11.4	431	11.1	48	373	383	0.128686	0
88	Chow-EX	426.4	0.805	0.303	0.156	9.3	8.8	398	8.6	34	354	364	0.0960452	0
89	Chow-EX	512.8	1.615	1.03	0.166	10.6	8	465	7.8	36	418	429	0.0861244	0
90	Chow-EX	471.2	0.805	0.71	0.17	10.3	9.3	432	9.1	39	382	393	0.102094	0
7	Chow-Sed	503.2	3.235	1.975	0.159	10.8	22.9	490	22.3	110	370	381	0.297297	0
8	Chow-Sed	602.3	3.64	2.04	0.169	13.1	24.1	589	23.5	139	437	450	0.318078	1
15	Chow-Sed	605.5	4.245	0.972	0.171	13.7	25.8	591	25.2	149	429	443	0.347319	0
16	Chow-Sed	696.6	6.775	1.121	0.185	15.4	33.6	679	32.8	223	441	456	0.505669	0			Correlations with OC score
63	Chow-Sed	559	6.775	0.777	0.175	12.9	28.5	558	27.8	155	390	403	0.397436	0
64	Chow-Sed	619	10.615	1.251	0.177	14.8	34.9	600	34.1	204	381	396	0.535433	0
71	Chow-Sed	507.1	2.425	0.42	0.165	11.8	21.3	499	20.8	104	383	395	0.27154	3
72	Chow-Sed	609.9	5.66	2.322	0.174	14.3	28.2	601	27.5	165	421	435	0.391924	4
79	Chow-Sed	549.5	5.965	1.843	0.16	11.9	28.1	534	27.5	147	376	388	0.390957	1
80	Chow-Sed	606.5	9.805	5.56	0.17	15.3	41.9	589	40.9	240	333	348	0.720721	0
3	HF-EX	639.1	12.335	2.067	0.184	16.7	36	626	35	219	390	407	0.561538	1
4	HF-EX	623.7	9.805	5.604	0.176	15.5	40.7	601	39.6	238	347	363	0.685879	0
43	HF-EX	567.6	6.165	3.079	0.176	13.5	23.7	555	23.1	128	413	426	0.309927	3			Insulin	-0.149967
44	HF-EX	533.1	7.885	0.796	0.165	13	31	521	30.2	158	350	363	0.451429	2			BMD	-0.0565807
51	HF-EX	491	3.435	0.415	0.167	11.5	22.8	479	22.2	107	361	373	0.296399	2
52	HF-EX	551.2	9.605	1.26	0.169	13.2	30.8	537	30	161	363	376	0.443526	6
67	HF-EX	629.3	21.235	3.599	0.172	16.1	50.3	614	49	301	297	313	1.01347	5
68	HF-EX	526.9	7.885	0.944	0.172	13.5	31.8	513	31	159	341	354	0.466276	5
75	HF-EX	500.5	3.94	1.785	0.172	11.8	17.4	490	17	83	395	407	0.210127	1
76	HF-EX	495.8	3.84	0.855	0.178	12.4	21.4	483	20.9	101	370	382	0.272973	3
29	HF-Sed	653.7	9	2.049	0.177	15.8	43.8	641	42.7	274	352	367	0.778409	2			Weight	-0.202799
30	HF-Sed	830.9	29.02	1.789	0.174	18.2	53.2	820	52	427	375	394	1.13867	2			% body fat	-0.304295
37	HF-Sed	761.4	11.12	1.622	0.19	18.8	40.3	748	39.3	294	435	454	0.675862	5			F:L ratio	-0.375194
38	HF-Sed	624.9	5.055	2.095	0.177	14.9	35.9	615	35.1	216	385	400	0.561039	5			Leptin	-0.318966
45	HF-Sed	729.5	35.8	6.82	0.183	18.3	58.2	720	56.8	409	293	312	1.3959	0			BMC	-0.168694
46	HF-Sed	657.4	6.67	0.406	0.179	16.5	50.7	647	49.4	319	311	327	1.02572	1
53	HF-Sed	653.7	28.72	2.272	0.176	16.8	51.4	641	50	320	303	320	1.05611	0
54	HF-Sed	775.5	41.36	6.802	0.186	18.8	54.2	761	52.8	402	340	359	1.18235	3
61	HF-Sed	779.8	50.665	9.178	0.18	18	62.4	769	60.9	468	283	301	1.65371	2
62	HF-Sed	871.7	55.215	8.185	0.181	19.9	63.1	854	61.7	527	308	328	1.71104	2
